# Supplementary material for: Silica single-layer inverse opal films: large-area crack-free fabrication and the regulation of transmittance in the visible region
Source: Royal Society of Chemistry journal article supplement (doi:10.1039/c8tc04804e), 2019-01-01
Supplement: c8tc04804e1.pdf [file c8tc04804e1.pdf]

## Supporting Information

### Silica single-layer inverse opals: large-area crack-free fabrication and the regulation of transmittance in visible region

Hua Li<sup>a, b, c, \*</sup>, Jianfeng Wang<sup>a</sup>, Shali Li<sup>a</sup>, Jacques Robichaud<sup>b</sup>, Dan Wang<sup>c</sup>, Zhe Wu<sup>c</sup>,  
Yahia Djaoued<sup>b,\*</sup>

a, Department of Inorganic Materials, College of Chemistry Chemical Engineering and Materials Science, Soochow University, 199 Renai Road, Suzhou, Jiangsu Province, 215123, PR China.

b, Laboratoire de Recherche en Matériaux et Micro-spectroscopies Raman et FTIR, Université de Moncton-Campus de Shippagan, Shippagan, NB, E8S1P6, Canada.

c, Suzhou Shinwu Optronics Technology Co. Ltd., 368 Youyi Road, Suzhou, Jiangsu Province, 215123, PR China.

\*Corresponding Author: Hua Li, E-mail:[lihua123@suda.edu.cn](mailto:lihua123@suda.edu.cn); Yahia Djaoued, E-mail:[yahia.djaoued@umoncton.ca](mailto:yahia.djaoued@umoncton.ca)

## Figures

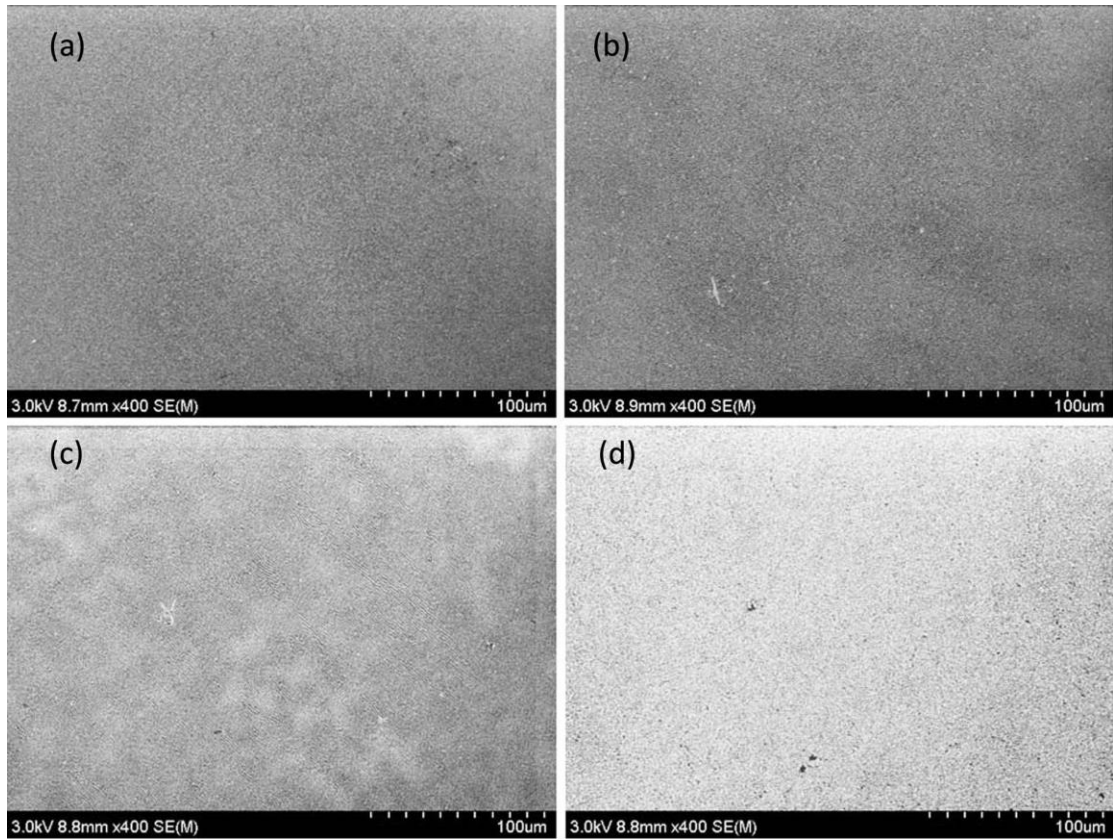

**Figure S1** Low magnification SEM images of SiO<sub>2</sub> single layer IO films: (a) S220; (b) S410; (c) S530; (d) S930.

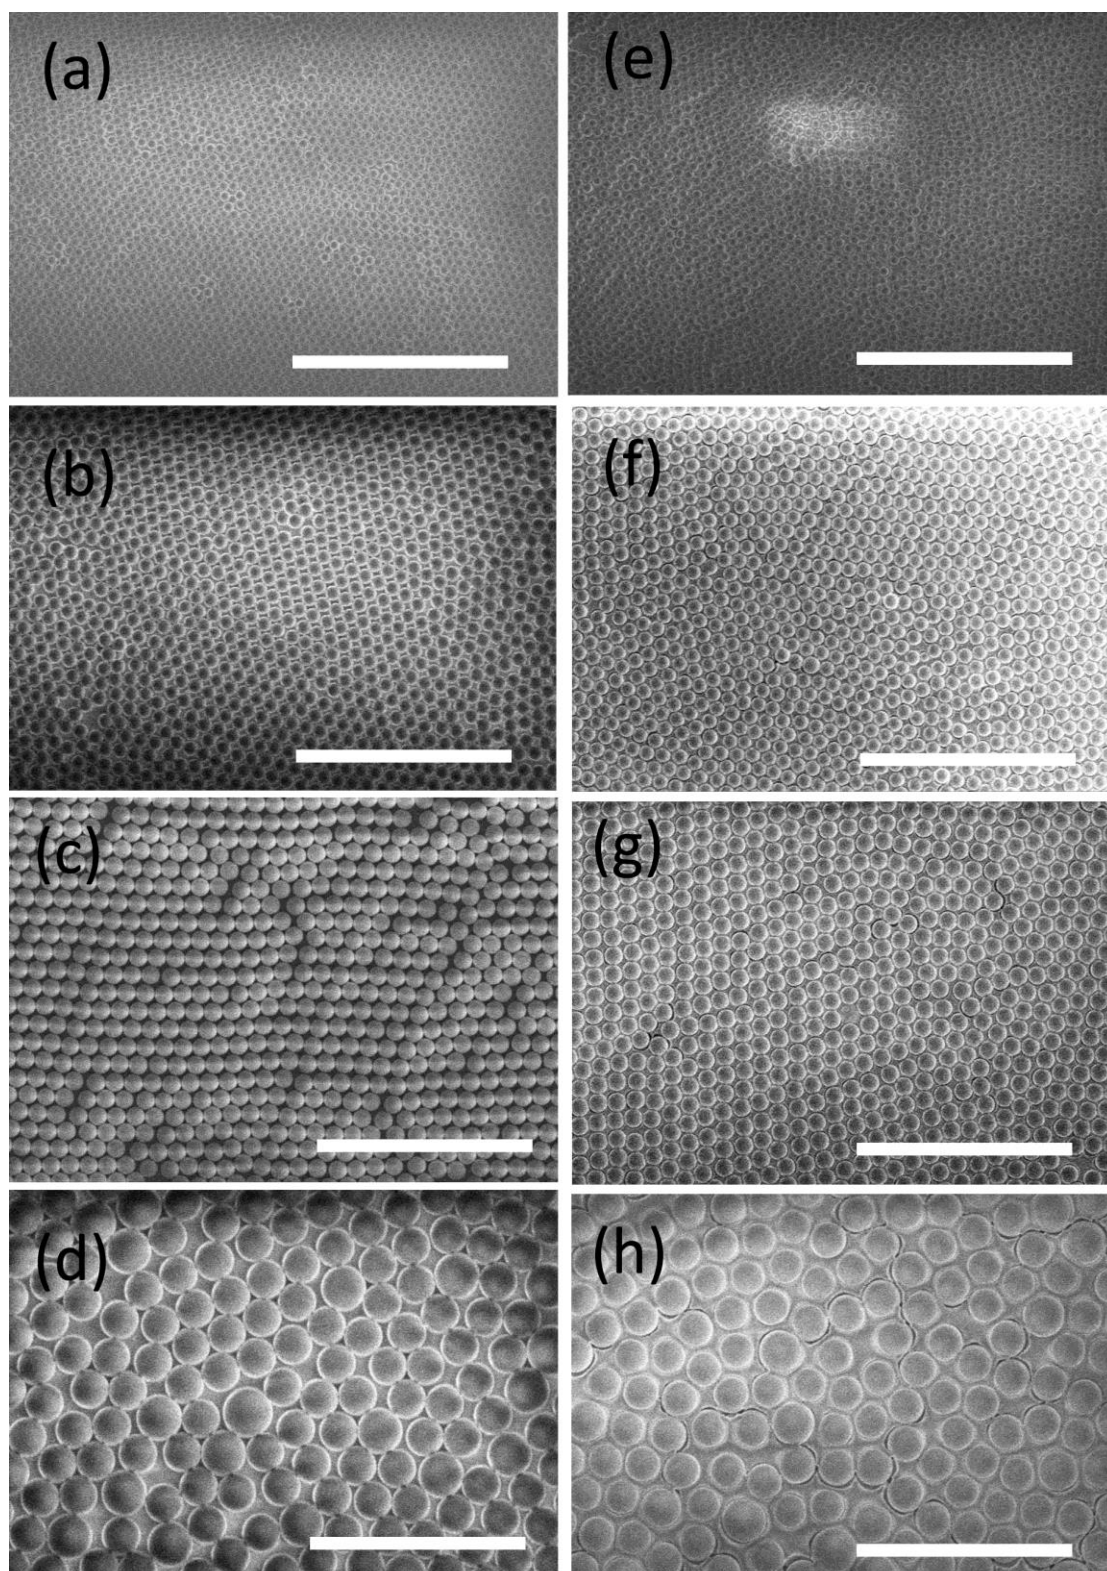

**Figure S2** SEM images for the single-layer PS opal (a-d, left) and SiO<sub>2</sub>/PS opal composite (e-h, right) obtained from 220 nm (a, e), 410 nm (b, f), 530 nm (c, g), 930 nm (d, h) PS spheres (scale bars are 5  $\mu$ m).

## Calculation S1:

### Refractive index of PS opal & SiO<sub>2</sub>/PS opal composite

#### Refractive index of PS opal series films

The prism-like unit structure of the PS opal films contains polystyrene and air and the effective refractive index of the film can be calculated using the following equation

$$n_{\text{eff(PS opal+air)}} = \sqrt{\frac{V_{\text{PS}}}{V_{\text{Tot}}} \times n_{\text{PS}}^2 + \frac{V_{\text{air}}}{V_{\text{Tot}}} \times n_{\text{air}}^2}, \quad (\text{S1})$$

where  $\frac{V_{\text{PS}}}{V_{\text{Tot}}}$ ,  $\frac{V_{\text{air}}}{V_{\text{Tot}}}$ ,  $n_{\text{PS}}$  and  $n_{\text{air}}$ , are respectively the volume ratios of polystyrene and air, and their corresponding refractive indexes. The total volume of the prism-like unit structure is given by:

$$V_{\text{Tot}} = \text{area of triangular base} * \text{height} * D = \frac{1}{2} D^2 \sqrt{D^2 - (D/2)^2}, \quad (\text{S2})$$

where D is the PS spheres diameter as well as the opal period.

The volume of PS spheres of radius R contained inside a unit structure is simply half the volume of a sphere, or

$$3 \cdot \frac{1}{6} \cdot \frac{4}{3} \pi R^3 = \frac{2}{3} \pi R^3. \quad (\text{S3})$$

Independently of the size of the PS spheres, the volume ratios of PS and air are the same for all PS series films and so are the refractive indexes of the films which are found to be 1.39.

#### Refractive index of SP series films

After the infiltration of SiO<sub>2</sub>, the volume of the opal unit structure can be found using modified equation (S2). This time, because of infiltration, the period of the SiO<sub>2</sub>/PS opal composite (see figure S3 bellow) is larger than the diameter of the PS spheres, and the volume of the unit structure is:

$$\frac{1}{2} D \sqrt{D^2 - \left(\frac{D}{2}\right)^2} * \varnothing, \quad (\text{S4})$$

Where  $\varnothing$  is the PS sphere diameter. Here the unit structure contains polystyrene, air and SiO<sub>2</sub>, and the refractive index of the SP series can be calculated using the following equation:

$$n_{\text{eff(PS+SiO}_2\text{+air)}} = \sqrt{\frac{V_{\text{PS}}}{V_{\text{Total}}} \cdot n_{\text{PS}}^2 + \frac{V_{\text{SiO}_2}}{V_{\text{Total}}} \cdot n_{\text{SiO}_2}^2 + \frac{V_{\text{air}}}{V_{\text{Total}}} \cdot n_{\text{air}}^2}, \quad (\text{S5})$$

where  $\frac{V_{\text{PS}}}{V_{\text{Total}}}$ ,  $\frac{V_{\text{SiO}_2}}{V_{\text{Total}}}$ , and  $\frac{V_{\text{air}}}{V_{\text{Total}}}$ , are respectively the volume ratios of the PS spheres,

SiO<sub>2</sub>, and air and  $n_{\text{PS}}^2$ ,  $n_{\text{SiO}_2}^2$ , and  $n_{\text{air}}^2$  are their corresponding refractive indexes. To find the volume of SiO<sub>2</sub> and air in the unit structure, and hence their volume ratios, we refer to Figure S1. At a certain height  $x$ , we consider a slice of thickness  $dx$  of the spheres taken through a plane normal to the figure. For a single sphere, this slice has a radius  $r(x)$ , so  $r(x)^2 = R^2 - (R - x)^2$ , and an area  $\pi r(x)^2$ . The volume of this slice is  $dV = \pi r(x)^2 dx$ . If the thickness of SiO<sub>2</sub> layer is “H”, the volume of PS spheres included inside a portion of height H of the structural unit (half a sphere) is thus given by

$$V_{\text{PS portion}}(H) = \frac{1}{2} \int_0^H \pi r(x)^2 dx = \frac{1}{2} \int_0^H (R^2 - (R - x)^2) dx = \frac{1}{2} \pi (RH^2 - H^3/3). \quad (\text{S6})$$

Accordingly, the volume of SiO<sub>2</sub> is given by subtracting the volume of PS spheres portion from the prism portion of height H, that is,

$$V_{\text{SiO}_2} = V_{\text{prism portion}} - V_{\text{PS portion}}. \quad (\text{S7})$$

The air and SiO<sub>2</sub> in the SP series opals occupy the space of the unit structure that has the looks of a golden cup. The volume of this golden cup is simply the volume of the PS portion in the prism-like unit structure subtracted from the total volume of the unit structure. The volume of air in the golden cup is thus

$$V_{\text{air}} = V_{\text{goldcup}} - V_{\text{SiO}_2}. \quad (\text{S8})$$

The volume ratios can then be obtained by dividing the values from equations (S6), (S7), and (S8) by the total volume of the unit structure.

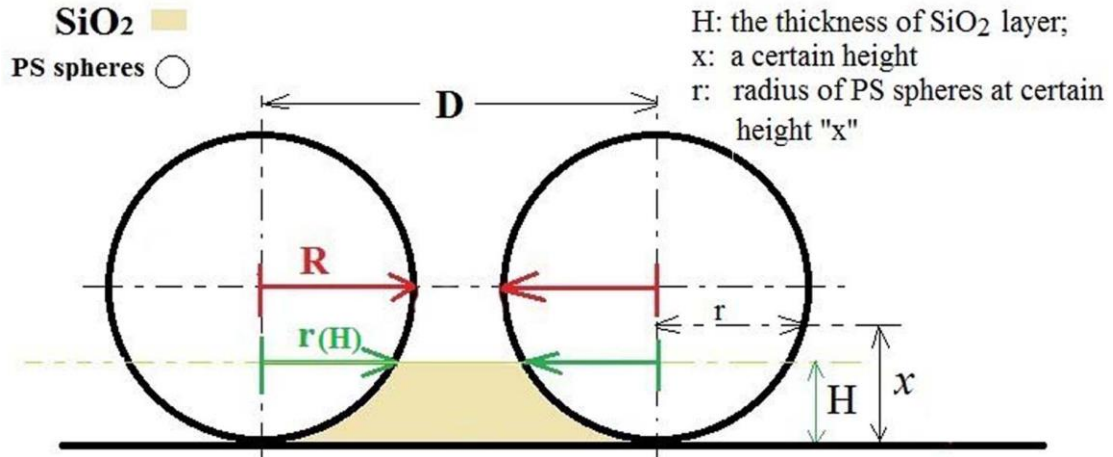

**Figure S3** Illustration of SiO<sub>2</sub>/PS opal composite.

## Calculation S2

### The Reflectance at the interface between film and substrate

Basically, when the incident light vertically travels from air to film, the interface reflectance could be calculated using the following equation derived from Fresnel's equations [see Ref.50 in the article]:

$$R_{iSP} = \left( \frac{n_1 - n_2}{n_1 + n_2} \right)^2 \quad (S9)$$

$n_1$ : refractive index of one phase;

$n_2$ : refractive index of other phase.

### Calculation of the interface reflection between film and substrate of of SP and PS series:

Here, we consider two conditions. First, for PS opal, the incident light travels directly from pore to substrate, so the "n" should be that of air (=1.0); second, in the case of SiO<sub>2</sub>/PS of the opal composite film, light travels from SiO<sub>2</sub> to substrate, so the "n" index should be that of SiO<sub>2</sub> (=1.42).

a) For SP series (i.e. SiO<sub>2</sub>/PS opal composite film on substrate):

Here the interface between SiO<sub>2</sub> and the glass substrate, except for dot-contact between PS spheres and substrate, the interface consist mainly from the SiO<sub>2</sub> contacting with the substrate ( $n_1 = 1.51$ ). So, the  $R_{iSP}$  is determined by SiO<sub>2</sub> ( $n_0=1.42$ ) and the substrate, calculated as follows:

$$R_{iSP} = \left( \frac{n_1 - n_0}{n_1 + n_0} \right)^2 \times 100 \% = \left( \frac{1.51 - 1.42}{1.51 + 1.42} \right)^2 \times 100 \% = 9.4 \times 10^{-4} \% \quad (S10)$$

b) For PS series(i.e. PS opal film on substrate):

Except for dot-contact between PS spheres and substrate, the interface mainly comes from air (from the pores) contacting with the substrate. So, the  $R_{iPS}$  is, calculated as follows:

$$R_{iPS} = \left( \frac{n_1 - n_0}{n_1 + n_0} \right)^2 \times 100 \% = \left( \frac{1.51 - 1.0}{1.51 + 1.0} \right)^2 \times 100 \% = 4.1 \% \quad (S11)$$
